# Supplementary material
Source: PubMed Central journal article supplement (PMC4221549)
Supplement: NIHMS623641-supplement-Supplemental_material.pdf [file NIHMS623641-supplement-Supplemental_material.pdf]

## **Supplemental Materials**

Supplemental Table 1: Data for mean and 95% confidence intervals are provided for the clinical epidemiology of hypertension displayed in Figure 2.

Supplemental Table 2. Descriptive data are provided for adults by age group.

Supplemental Table 2a. P-values are provided for differences between age groups within each NHANES time period

Supplemental Table 2b. P-values are provided for differences within age groups between NHANES time periods.

Supplemental Table 3. Descriptive data are provided for adults by race/ethnicity subgroup.

Supplemental Table 3a. P-values are provided for differences between race/ethnicity groups within each NHANES time period.

Supplemental Table 3b. P-values are provided for differences within race/ethnicity group between NHANES time periods.

Supplemental Table 1. Data for the clinical epidemiology of hypertension 1999–2012 among adults  $\geq 18$  years old.

| <b>NHANES<br/>Time Period</b> | <b>Prevalence</b>   | <b>Aware</b>        | <b>Treated</b>      | <b>Control/Treated</b> | <b>Control</b>      |
|-------------------------------|---------------------|---------------------|---------------------|------------------------|---------------------|
| 1999-2000                     | 30.1<br>27.2 – 32.9 | 69.6<br>66.0–73.2   | 59.8<br>54.4 – 65.1 | 53.3<br>48.9 – 57.8    | 32.2<br>27.4 – 37.0 |
| 2000-2002                     | 29.3<br>27.4 – 31.1 | 71.1<br>67.9 – 74.2 | 61.0<br>57.7 – 64.3 | 58.6<br>56.1 – 61.0    | 35.6<br>32.6 – 38.6 |
| 2003-2004                     | 30.8<br>28.7 – 33.0 | 76.1<br>71.9 – 80.4 | 66.0<br>61.2 – 70.8 | 62.2<br>58.4 – 66.0    | 41.0<br>36.8 – 45.2 |
| 2005-2006                     | 30.1<br>27.8 – 32.4 | 78.4<br>75.4 – 81.4 | 68.7<br>65.7 – 71.7 | 66.1<br>62.1 – 70.1    | 45.1<br>41.6 – 48.7 |
| 2007-2008                     | 30.3<br>28.8 – 31.7 | 81.2<br>79.1 – 83.3 | 73.6<br>71.4 – 75.7 | 68.6<br>65.1 – 72.0    | 50.4<br>47.0 – 53.9 |
| 2009-2010                     | 29.9<br>27.6 – 32.2 | 81.7<br>78.9 – 84.5 | 76.5<br>73.0 – 80.0 | 70.4<br>68.5 – 72.2    | 53.8<br>50.9 – 56.8 |
| 2011-2012                     | 30.8<br>29.2 – 32.5 | 82.0<br>79.1 – 85.0 | 74.7<br>71.1 – 78.4 | 68.9<br>65.3 – 72.5    | 51.2<br>46.5 – 55.8 |
| <b>P-value trend</b>          | 0.3192              | 0.0007              | 0.0004              | 0.0015                 | 0.0006              |

Data are presented as percentages with mean and 95% confidence intervals. NHANES=National Health and Nutrition Examination Survey.

Supplemental Table 2. Characteristics of adults with hypertension by age group in three NHANES time periods.

| NHANES                          | 1999-2004  |            |            | 2005-2008  |            |            | 2009-2012  |            |            |
|---------------------------------|------------|------------|------------|------------|------------|------------|------------|------------|------------|
| Age Group                       | <45        | 45-64      | ≥65        | <45        | 45-64      | ≥65        | <45        | 45-64      | ≥65        |
| <b>Sample, N</b>                | 628        | 1688       | 2445       | 463        | 1428       | 1670       | 494        | 1630       | 1816       |
| <b>U.S. Population, N</b>       | 10150938   | 24057398   | 21982426   | 10157602   | 28442174   | 23119980   | 10053044   | 30935491   | 25913142   |
| <b>*All HTN, %</b>              | 18.1(1.0)  | 42.8(1.0)  | 39.1(0.9)  | 16.5(1.4)  | 46.1(1.1)  | 37.5(1.7)  | 15.0(0.8)  | 46.2(0.9)  | 38.7(1.0)  |
| <b>Age, yr</b>                  | 36.0(0.5)  | 54.4(0.2)  | 74.4(0.2)  | 36.2(0.4)  | 54.8(0.2)  | 74.1(0.2)  | 35.9(0.4)  | 55.6(0.2)  | 73.8(0.2)  |
| <b>Sex, M:F</b>                 |            |            |            |            |            |            |            |            |            |
| <b>Male, %</b>                  | 63.8(2.4)  | 47.7(1.2)  | 38.4(1.0)  | 64.5(1.9)  | 48.7(1.7)  | 40.3(0.8)  | 59.5(2.3)  | 50.1(1.9)  | 42.8(1.2)  |
| <b>Female, %</b>                | 36.2(2.4)  | 52.3(1.2)  | 61.6(1.0)  | 35.5(1.9)  | 51.3(1.7)  | 59.7(0.8)  | 40.5(2.3)  | 49.9(1.9)  | 57.2(1.2)  |
| <b>Race</b>                     |            |            |            |            |            |            |            |            |            |
| <b>White, %</b>                 | 61.2(2.4)  | 71.5(2.5)  | 82.0(1.9)  | 63.4(4.2)  | 70.8(2.8)  | 82.8(2.0)  | 58.3(4.0)  | 69.0(3.3)  | 77.2(2.3)  |
| <b>Black, %</b>                 | 19.6(2.6)  | 14.7(1.7)  | 8.6(1.2)   | 19.5(3.2)  | 16.2(2.3)  | 9.5(1.4)   | 21.8(3.1)  | 16.3(2.2)  | 9.8(1.3)   |
| <b>Hispanic, %</b>              | 14.0(2.3)  | 8.6(1.5)   | 7.0(2.0)   | 11.2(2.1)  | 8.0(1.1)   | 5.2(1.0)   | 12.3(2.1)  | 9.5(1.8)   | 7.4(1.6)   |
| <b>Other, %</b>                 | 5.3(1.6)   | 5.2(0.7)   | 2.4(0.4)   | 5.9(1.7)   | 4.9(0.7)   | 2.5(0.6)   | 7.6(1.6)   | 5.2(1.0)   | 5.6(1.0)   |
| <b>Healthcare visits/yr</b>     |            |            |            |            |            |            |            |            |            |
| <b>0-1</b>                      | 34.2(2.1)  | 23.8(1.4)  | 12.8(0.8)  | 34.1(2.3)  | 22.6(1.5)  | 10.7(0.8)  | 27.8(2.2)  | 20.9(1.5)  | 10.5(1.0)  |
| <b>≥2</b>                       | 65.8(2.1)  | 76.2(1.4)  | 87.2(0.8)  | 65.9(2.3)  | 77.4(1.5)  | 89.3(0.8)  | 72.2(2.2)  | 79.1(1.5)  | 89.5(1.0)  |
| <b>Insured</b>                  | 76.8(1.7)  | 88.2(1.1)  | 99.2(0.2)  | 79.4(2.3)  | 84.6(1.2)  | 98.5(0.3)  | 77.6(2.7)  | 84.8(1.2)  | 97.9(0.4)  |
| <b>BMI, kg/m<sup>2</sup></b>    | 31.5(0.4)  | 30.9(0.3)  | 28.3(0.1)  | 32.3(0.4)  | 31.4(0.3)  | 28.8(0.2)  | 33.3(0.4)  | 31.6(0.3)  | 29.4(0.2)  |
| <b>BMI ≥30, %</b>               | 53.0(2.5)  | 48.7(1.5)  | 32.6(1.3)  | 55.0(2.5)  | 51.5(1.8)  | 35.2(1.2)  | 61.2(2.9)  | 53.2(2.3)  | 40.3(1.5)  |
| <b>SBP, mmHg</b>                | 133.7(0.8) | 138.6(0.6) | 147.5(0.7) | 132.6(0.9) | 134.6(0.6) | 140.4(0.7) | 133.5(0.9) | 132.2(0.9) | 137.6(0.7) |
| <b>DBP, mmHg</b>                | 85.5(0.5)  | 80.0(0.5)  | 68.8(0.4)  | 82.2(0.8)  | 77.5(0.4)  | 66.9(0.5)  | 83.5(1.0)  | 76.1(0.6)  | 65.3(0.5)  |
| <b>Non-HDL</b>                  | 156.8(2.1) | 160.9(1.4) | 154.9(1.1) | 154.2(2.9) | 153.3(1.2) | 139.7(1.1) | 151.4(2.0) | 150.5(1.7) | 135.3(1.3) |
| <b>Hypercholesterolemia, %</b>  | 39.5(2.6)  | 62.4(1.8)  | 70.6(1.0)  | 43.5(3.2)  | 63.1(1.5)  | 70.1(1.5)  | 40.6(2.5)  | 65.1(2.0)  | 69.8(1.4)  |
| <b>Cholesterol Treatment, %</b> | 8.1(1.5)   | 23.8(1.2)  | 29.4(1.2)  | 12.1(1.5)  | 32.6(1.7)  | 41.6(1.4)  | 13.0(2.1)  | 36.8(2.1)  | 46.7(1.5)  |
| <b>Diabetes, %</b>              | 8.8(1.2)   | 20.7(1.1)  | 24.5(1.1)  | 14.7(1.7)  | 23.8(1.6)  | 30.9(1.5)  | 14.5(1.8)  | 26.9(1.7)  | 32.4(1.3)  |
| <b>CVD, %</b>                   | 5.1(0.9)   | 16.3(1.5)  | 31.5(1.3)  | 5.5(1.3)   | 16.7(1.5)  | 34.3(1.5)  | 6.7(1.1)   | 15.0(0.9)  | 32.1(1.5)  |
| <b>CKD, %</b>                   | 4.5(0.9)   | 7.2(0.7)   | 29.4(1.1)  | 5.4(1.3)   | 9.0(1.2)   | 30.4(0.8)  | 4.4(1.0)   | 8.3(1.0)   | 29.3(1.7)  |
| <b>Smoking, %</b>               | 28.5(2.2)  | 21.6(1.2)  | 7.5(0.7)   | 30.2(2.8)  | 24.1(1.7)  | 7.8(0.6)   | 24.9(2.6)  | 19.1(1.5)  | 7.5(0.8)   |
| <b>10-yr CHD &gt;20%</b>        | 13.1(1.5)  | 33.1(1.7)  | 53.6(1.3)  | 19.6(1.8)  | 35.1(1.9)  | 57.9(1.8)  | 18.8(2.2)  | 37.6(1.8)  | 55.6(1.5)  |
| <b>10-yr CHD &lt;10%</b>        | 42.1(2.5)  | 22.3(1.5)  | 8.6(0.7)   | 41.7(3.7)  | 18.4(1.6)  | 8.7(0.9)   | 46.4(4.0)  | 18.8(1.7)  | 7.2(0.9)   |

Table Legend: Data are presented as mean and Standard Error. \* Percent of all hypertensive adults in time period accounted for by age group.

Abbreviations: NHANES=National Health and Nutrition Examination Survey; N=number; HTN=hypertension; M=male; F=female; HC=healthcare; BMI=body mass index; S=systolic; D=diastolic; BP=blood pressure; non-HDL=non-high-density lipoprotein cholesterol; CVD=cardiovascular disease; CKD=chronic kidney disease; 10-yr CHD Risk=Framingham 10-yr coronary heart disease risk.

Supplemental Table 2a. P-values for Supplemental Table 1 (between groups within NHANES time period).

| NHANES                                                  | 1999-2004       |                 |               | 2005-2008       |                 |               | 2009-2012       |                 |               |
|---------------------------------------------------------|-----------------|-----------------|---------------|-----------------|-----------------|---------------|-----------------|-----------------|---------------|
|                                                         | <45 vs<br>45-64 | 45-64<br>vs ≥65 | <45 vs<br>≥65 | <45 vs<br>45-64 | 45-64<br>vs ≥65 | <45 vs<br>≥65 | <45 vs<br>45-64 | 45-64 vs<br>≥65 | <45 vs<br>≥65 |
| <b>Age, yr</b>                                          | <0.001          | <0.001          | <0.001        | <0.001          | <0.001          | <0.001        | <0.001          | <.001           | <0.001        |
| <b>Sex, M:F (proportion of<br/>M and F)</b>             | <0.001          | <0.001          | <0.001        | <0.001          | <0.001          | <0.001        | <0.001          | 0.002           | <0.001        |
| <b>Race (proportion of<br/>W:B:H)</b>                   | <0.001          | <0.001          | <0.001        | 0.06            | <0.001          | <0.001        | 0.002           | <0.001          | <0.001        |
| <b>Healthcare visits/yr<br/>(proportion of 0-1, ≥2)</b> | <0.001          | <0.001          | <0.001        | <0.001          | <0.001          | <0.001        | 0.003           | <0.001          | <0.001        |
| <b>Insured</b>                                          | <0.001          | <0.001          | <0.001        | 0.02            | <0.001          | <0.001        | 0.004           | <0.001          | <0.001        |
| <b>BMI, kg/m<sup>2</sup></b>                            | 0.19            | <0.001          | <0.001        | 0.06            | <0.001          | <0.001        | 0.01            | <0.001          | <0.001        |
| <b>BMI ≥30</b>                                          | 0.15            | <0.001          | <0.001        | 0.27            | <0.001          | <0.001        | 0.04            | <0.001          | <0.001        |
| <b>SBP, mmHg</b>                                        | <0.001          | <0.001          | <0.001        | 0.06            | <0.001          | <0.001        | 0.27            | <0.001          | <0.001        |
| <b>DBP, mmHg</b>                                        | <0.001          | <0.001          | <0.001        | <0.001          | <0.001          | <0.001        | <0.001          | <0.001          | <0.001        |
| <b>Non-HDL, mg/dL</b>                                   | 0.12            | <0.001          | 0.36          | 0.78            | <0.001          | <0.001        | 0.77            | <0.001          | <0.001        |
| <b>Hypercholesterolemia,%</b>                           | <0.001          | <0.001          | <0.001        | <0.001          | 0.002           | <0.001        | <0.001          | 0.05            | <0.001        |
| <b>Cholesterol treatment,%</b>                          | <0.001          | <.001           | <0.001        | <0.001          | <0.001          | <0.001        | <0.001          | <0.001          | <0.001        |
| <b>Diabetes, %,</b>                                     | <0.001          | 0.02            | <0.001        | <0.001          | <0.001          | <0.001        | <0.001          | 0.02            | <0.001        |
| <b>CVD, %</b>                                           | <0.001          | <0.001          | <0.001        | <0.001          | <0.001          | <0.001        | <0.001          | <0.001          | <0.001        |
| <b>CKD, %</b>                                           | 0.06            | <0.001          | <0.001        | 0.01            | <0.001          | <0.001        | 0.03            | <0.001          | <0.001        |
| <b>Smoking, %</b>                                       | 0.002           | <0.001          | <0.001        | 0.06            | <0.001          | <0.001        | 0.04            | <0.001          | <0.001        |
| <b>10-yr CHD</b>                                        | <0.001          | <0.001          | <0.001        | <0.001          | <0.001          | <0.001        | <0.001          | <0.001          | <0.001        |

Table Legend: NHANES=National Health and Nutrition Examination Survey; M=male; F=female; BMI=body mass index; S=systolic; D=diastolic; BP=blood pressure; non-HDL=non-high-density lipoprotein cholesterol; CVD=cardiovascular disease; CKD=chronic kidney disease; 10-yr CHD Risk=Framingham 10-yr coronary heart disease risk. P-values <0.017 are statistically significant, i.e., 3-way comparison with Bonferonni correction. P-values reflect within NHANES period comparisons with values in column 1 representing comparisons with column 2, column 2 with column 3, and column 3 with column 1.

Supplemental Table 2b. P-values for Supplemental Table 1 (within group between NHANES time periods).

| NHANES                         | 1999-2004 vs 2005-2008 |        |        | 2005-2008 vs 2009-2012 |       |       | 1999-2004 vs 2009-2012 |        |        |
|--------------------------------|------------------------|--------|--------|------------------------|-------|-------|------------------------|--------|--------|
|                                | <45                    | 45-64  | ≥65    | <45                    | 45-64 | ≥65   | <45                    | 45-64  | ≥65    |
| <b>Age group, years</b>        |                        |        |        |                        |       |       |                        |        |        |
| <b>Age, years</b>              | 0.79                   | 0.16   | 0.34   | 0.66                   | 0.01  | 0.16  | 0.91                   | <0.001 | 0.02   |
| <b>Sex, M:F</b>                |                        |        |        |                        |       |       |                        |        |        |
| <b>Male, %</b>                 | 0.83                   | 0.65   | 0.20   | 0.09                   | 0.59  | 0.09  | 0.21                   | 0.30   | 0.01   |
| <b>Female, %</b>               | 0.83                   | 0.65   | 0.20   | 0.09                   | 0.59  | 0.09  | 0.21                   | 0.30   | 0.01   |
| <b>Race (W:B:H:O)</b>          |                        |        |        |                        |       |       |                        |        |        |
| <b>White, %</b>                | 0.63                   | 0.86   | 0.78   | 0.38                   | 0.68  | 0.07  | 0.53                   | 0.55   | 0.11   |
| <b>Black, %</b>                | 0.98                   | 0.57   | 0.62   | 0.60                   | 0.99  | 0.89  | 0.58                   | 0.56   | 0.51   |
| <b>Hispanic, %</b>             | 0.38                   | 0.75   | 0.48   | 0.73                   | 0.49  | 0.25  | 0.58                   | 0.70   | 0.87   |
| <b>Other, %</b>                | 0.78                   | 0.76   | 0.95   | 0.47                   | 0.82  | 0.01  | 0.32                   | 0.99   | 0.001  |
| <b>Healthcare visits/yr</b>    |                        |        |        |                        |       |       |                        |        |        |
| <b>0-1</b>                     | 0.99                   | 0.56   | 0.07   | 0.05                   | 0.42  | 0.92  | 0.04                   | 0.15   | 0.07   |
| <b>≥2</b>                      | 0.99                   | 0.56   | 0.07   | 0.05                   | 0.42  | 0.92  | 0.04                   | 0.15   | 0.07   |
| <b>Insured</b>                 | 0.36                   | 0.02   | 0.06   | 0.63                   | 0.91  | 0.18  | 0.78                   | 0.03   | 0.002  |
| <b>BMI, kg/m<sup>2</sup></b>   | 0.15                   | 0.17   | 0.05   | 0.11                   | 0.66  | 0.03  | 0.001                  | 0.10   | <0.001 |
| <b>BMI ≥30</b>                 | 0.59                   | 0.23   | 0.16   | 0.11                   | 0.57  | 0.01  | 0.03                   | 0.09   | <0.001 |
| <b>SBP, mmHg</b>               | 0.35                   | <0.001 | <0.001 | 0.47                   | 0.03  | 0.005 | 0.87                   | <0.001 | <0.001 |
| <b>DBP, mmHg</b>               | <0.001                 | <0.001 | 0.003  | 0.33                   | 0.06  | 0.03  | 0.06                   | <0.001 | <0.001 |
| <b>Non-HDL</b>                 | 0.45                   | <0.001 | <.001  | 0.43                   | 0.19  | 0.01  | 0.07                   | <0.001 | <0.001 |
| <b>Hypercholesterolemia,%</b>  | 0.33                   | 0.75   | 0.78   | 0.47                   | 0.44  | 0.88  | 0.77                   | 0.31   | 0.64   |
| <b>Cholesterol treatment,%</b> | 0.07                   | <0.001 | <0.001 | 0.73                   | 0.12  | 0.01  | 0.05                   | <0.001 | <0.001 |
| <b>Diabetes, %,</b>            | 0.004                  | 0.10   | <0.001 | 0.96                   | 0.19  | 0.43  | 0.01                   | 0.003  | <0.001 |
| <b>CVD, %</b>                  | 0.80                   | 0.86   | 0.18   | 0.49                   | 0.31  | 0.30  | 0.27                   | 0.43   | 0.78   |
| <b>CKD, %</b>                  | 0.54                   | 0.18   | 0.49   | 0.52                   | 0.67  | 0.54  | 0.93                   | 0.38   | 0.94   |
| <b>Smoking, %</b>              | 0.63                   | 0.22   | 0.77   | 0.17                   | 0.03  | 0.78  | 0.29                   | 0.19   | 0.98   |
| <b>10-yr CHD</b>               |                        |        |        |                        |       |       |                        |        |        |
| <b>&gt;20,%</b>                | 0.01                   | 0.41   | 0.04   | 0.80                   | 0.35  | 0.31  | 0.03                   | 0.07   | 0.32   |
| <b>&lt;10,%</b>                | 0.92                   | 0.08   | 0.94   | 0.39                   | 0.85  | 0.23  | 0.34                   | 0.13   | 0.21   |

Table Legend: Abbreviations: NHANES=National Health and Nutrition Examination Survey; M=male; F=female; BMI=body mass index; S=systolic; D=diastolic; BP=blood pressure; non-HDL=non-high-density lipoprotein cholesterol; CVD=cardiovascular disease; CKD=chronic kidney disease; 10-yr CHD Risk=Framingham 10-yr coronary heart disease risk. P-values ≤0.01 are statistically significant. P-values in column 1 of NHANES 1999–2004 reflect comparisons with column 1 of NHANES 2005–2008, 2005–2008 with 2009–2012, and 2009–2012 with 1999–2004. Values in columns 2 and 3 reflect time period comparisons described for column 1.

Supplemental Table 3. Characteristics of adults with hypertension by race/ethnicity group in three NHANES time periods.

| <b>NHANES Period</b>           | <b>1999-2004</b> |            |            | <b>2005-2008</b> |            |            | <b>2009-2012</b> |            |            |
|--------------------------------|------------------|------------|------------|------------------|------------|------------|------------------|------------|------------|
| <b>Race/Ethnicity</b>          | White            | Black      | Hispanic   | White            | Black      | Hispanic   | White            | Black      | Hispanic   |
| <b>Sample, N</b>               | 2447             | 1100       | 1071       | 1833             | 961        | 664        | 1733             | 1122       | 779        |
| <b>US Population, N</b>        | 41430914         | 7411633    | 5024388    | 45726048         | 8803740    | 4614791    | 47215169         | 9769619    | 6096419    |
| <b>*All HTN, %</b>             | 73.7(1.9)        | 13.2(1.5)  | 8.9(1.6)   | 74.1(2.5)        | 14.3(2.0)  | 7.5(1.0)   | 70.6(2.9)        | 14.6(1.9)  | 9.1(1.6)   |
| <b>Age, years</b>              | 60.6(0.4)        | 54.1(0.6)  | 54.7(1.4)  | 60.4(0.7)        | 54.7(0.6)  | 54.6(0.9)  | 61.1(0.4)        | 55.3(0.6)  | 56.8(0.9)  |
| <b>Sex, M:F</b>                |                  |            |            |                  |            |            |                  |            |            |
| <b>Male, %</b>                 | 47.7(1.0)        | 43.6(1.8)  | 46.5(2.8)  | 49.0(1.0)        | 42.9(1.8)  | 51.7(1.9)  | 49.0(1.4)        | 43.4(1.5)  | 50.8(1.8)  |
| <b>Female, %</b>               | 52.3(1.0)        | 56.4(1.8)  | 53.5(2.8)  | 51.0(1.0)        | 57.1(1.8)  | 48.3(1.9)  | 51.0(1.4)        | 56.6(1.5)  | 49.2(1.8)  |
| <b>Healthcare visits/year</b>  |                  |            |            |                  |            |            |                  |            |            |
| <b>0-1</b>                     | 19.9(1.0)        | 23.5(1.2)  | 28.2(2.4)  | 18.2(1.2)        | 19.4(1.3)  | 33.2(2.7)  | 16.4(1.2)        | 18.0(1.2)  | 26.4(2.5)  |
| <b>≥2</b>                      | 80.1(1.0)        | 76.5(1.2)  | 71.8(2.4)  | 81.8(1.2)        | 80.6(1.3)  | 66.8(2.7)  | 83.6(1.2)        | 82.0(1.2)  | 73.6(2.5)  |
| <b>Insured, %</b>              | 93.4(0.9)        | 85.3(1.2)  | 75.6(3.1)  | 91.9(0.8)        | 84.1(1.2)  | 68.5(3.3)  | 92.7(0.9)        | 83.3(1.9)  | 71.1(2.3)  |
| <b>BMI, kg/m<sup>2</sup></b>   | 29.9(0.2)        | 31.1(0.2)  | 30.3(0.3)  | 30.4(0.2)        | 32.2(0.3)  | 30.4(0.3)  | 30.6(0.3)        | 33.0(0.4)  | 32.0(0.3)  |
| <b>BMI ≥30</b>                 | 42.5(1.2)        | 49.4(1.6)  | 46.8(2.9)  | 44.3(1.2)        | 55.5(1.9)  | 47.8(3.3)  | 47.7(1.7)        | 58.3(1.7)  | 58.3(2.0)  |
| <b>SBP, mmHg</b>               | 140.4(0.5)       | 143.1(0.7) | 143.7(1.2) | 135.7(0.5)       | 138.7(0.6) | 139.5(0.9) | 133.5(0.7)       | 136.7(1.1) | 138.1(0.9) |
| <b>DBP, mmHg</b>               | 75.4(0.4)        | 79.9(0.6)  | 78.7(0.8)  | 73.5(0.5)        | 77.2(0.6)  | 76.6(1.0)  | 72.2(0.7)        | 76.1(0.9)  | 75.3(1.0)  |
| <b>Non-HDL, mg/dL</b>          | 158.0(1.1)       | 152.6(2.2) | 161.8(2.1) | 148.6(1.0)       | 139.9(1.7) | 159.0(1.7) | 145.4(1.2)       | 138.3(1.3) | 151.9(2.4) |
| <b>Hypercholesterolemia,%</b>  | 63.2(1.1)        | 52.0(2.5)  | 60.0(3.2)  | 64.3(1.2)        | 52.1(2.0)  | 63.2(2.8)  | 64.4(1.4)        | 55.6(1.7)  | 67.2(2.4)  |
| <b>Cholesterol Treatment,%</b> | 25.4(1.1)        | 15.6(1.2)  | 16.7(1.7)  | 34.2(1.4)        | 27.8(1.4)  | 26.9(2.4)  | 38.1(1.5)        | 32.3(1.4)  | 37.0(2.3)  |
| <b>Diabetes, %</b>             | 17.7(0.7)        | 26.4(1.4)  | 27.2(2.3)  | 22.2(1.4)        | 34.7(2.3)  | 34.7(2.7)  | 23.2(0.9)        | 35.1(1.6)  | 40.6(2.7)  |
| <b>CVD, %</b>                  | 21.3(0.9)        | 19.5(1.3)  | 11.6(1.5)  | 21.8(1.5)        | 23.9(1.9)  | 16.3(1.5)  | 20.4(1.1)        | 21.1(1.3)  | 18.7(2.1)  |
| <b>CKD, %</b>                  | 16.1(0.8)        | 13.2(1.2)  | 12.7(2.1)  | 17.6(1.2)        | 13.6(1.1)  | 12.5(1.6)  | 16.7(1.2)        | 13.5(1.2)  | 14.5(1.7)  |
| <b>Smoking, %</b>              | 15.7(0.9)        | 24.2(1.5)  | 18.5(2.0)  | 18.3(1.3)        | 23.6(1.7)  | 18.3(2.1)  | 13.5(1.2)        | 25.4(2.6)  | 15.2(1.3)  |
| <b>10-yr CHD</b>               |                  |            |            |                  |            |            |                  |            |            |
| <b>&gt;20%</b>                 | 37.2(1.0)        | 38.7(1.4)  | 36.0(2.2)  | 40.1(1.9)        | 45.3(2.2)  | 44.9(2.8)  | 39.2(1.3)        | 45.0(1.8)  | 52.6(2.9)  |
| <b>&lt;10%</b>                 | 19.6(0.9)        | 26.1(1.8)  | 19.5(2.1)  | 16.9(1.5)        | 25.8(2.4)  | 20.0(2.7)  | 18.2(1.3)        | 22.4(1.6)  | 14.3(1.8)  |

\*Percent of all hypertensives in time period accounted for by race/ethnicity group. Data are presented as mean and Standard Error. Abbreviations: NHANES=National Health and Nutrition Examination Survey; N=number; HTN=hypertension; M=male; F=female; BMI=body mass index; S=systolic;

D=diastolic; BP=blood pressure; non-HDL=non-high-density lipoprotein cholesterol; CVD=cardiovascular disease; CKD=chronic kidney disease; 10-yr CHD Risk=Framingham 10-yr coronary heart disease risk.

Supplemental Table 3a. P values for Supplemental Table 2 (between groups within NHANES time period).

| NHANES Period                                           | 1999-2004      |                   |                   | 2005-2008      |                   |                   | 2009-2012      |                   |                   |
|---------------------------------------------------------|----------------|-------------------|-------------------|----------------|-------------------|-------------------|----------------|-------------------|-------------------|
|                                                         | White vs Black | Black vs Hispanic | White vs Hispanic | White vs Black | Black vs Hispanic | White vs Hispanic | White vs Black | Black vs Hispanic | White vs Hispanic |
| <b>Age, years</b>                                       | <0.001         | 0.71              | <0.001            | <0.001         | 0.87              | <0.001            | <0.001         | 0.17              | <0.001            |
| <b>Sex, M:F (distribution of M and F)</b>               | 0.03           | 0.44              | 0.70              | 0.002          | 0.001             | 0.21              | 0.01           | 0.002             | 0.35              |
| <b>Healthcare visits/year (distribution 0-1 and ≥2)</b> | 0.01           | 0.06              | <0.001            | 0.48           | <0.001            | <0.001            | 0.30           | 0.003             | <0.001            |
| <b>Insured</b>                                          | <0.001         | <0.001            | <0.001            | <0.001         | <0.001            | <0.001            | <0.001         | <0.001            | <0.001            |
| <b>BMI, kg/m<sup>2</sup></b>                            | <0.001         | 0.01              | 0.34              | <0.001         | <0.001            | 0.83              | <0.001         | 0.03              | 0.002             |
| <b>BMI ≥30</b>                                          | <0.001         | 0.35              | 0.18              | <0.001         | 0.07              | 0.36              | <0.001         | 0.99              | <0.001            |
| <b>SBP, mmHg</b>                                        | 0.003          | 0.66              | 0.02              | <0.001         | 0.48              | <0.001            | 0.01           | 0.28              | <0.001            |
| <b>DBP, mmHg</b>                                        | <0.001         | 0.36              | 0.002             | <0.001         | 0.59              | 0.01              | <0.001         | 0.51              | 0.004             |
| <b>Non-HDL, mg/dL</b>                                   | 0.02           | 0.002             | 0.11              | <0.001         | <0.001            | <0.001            | <0.001         | <0.001            | 0.03              |
| <b>Hypercholesterolemia,%</b>                           | <0.001         | 0.04              | 0.33              | <0.001         | <0.001            | 0.71              | <0.001         | <0.001            | 0.30              |
| <b>Cholesterol treatment,%</b>                          | <0.001         | 0.58              | <0.001            | <0.001         | 0.73              | 0.004             | 0.001          | 0.12              | 0.64              |
| <b>Diabetes, %,</b>                                     | <0.001         | 0.76              | <0.001            | <0.001         | 0.99              | <0.001            | <0.001         | 0.05              | <0.001            |
| <b>CVD, %</b>                                           | 0.24           | 0.002             | <0.001            | 0.31           | 0.001             | 0.02              | 0.68           | 0.33              | 0.50              |
| <b>CKD, %</b>                                           | 0.04           | 0.88              | 0.19              | 0.005          | 0.53              | 0.01              | 0.01           | 0.65              | 0.25              |
| <b>Smoking, %</b>                                       | <0.001         | 0.003             | 0.16              | 0.01           | 0.06              | 0.96              | <0.001         | <0.001            | 0.33              |
| <b>10-yr CHD (proportion &gt;20 vs. &lt;10%)</b>        | <0.001         | 0.003             | 0.87              | <0.001         | 0.08              | 0.05              | <0.001         | <0.001            | <0.001            |

NHANES=National Health and Nutrition Examination Survey; M=male; F=female; BMI=body mass index; S=systolic; D=diastolic; BP=blood pressure; non-HDL=non-high-density lipoprotein cholesterol; CVD=cardiovascular disease; CKD=chronic kidney disease; 10-yr CHD Risk=Framingham 10-yr coronary heart disease risk. P-values ≤0.01 are statistically significant. P-values reflect within NHANES period comparisons with values in column 1 representing comparisons with column 2, column 2 with column 3, and column 3 with column 1.

Supplemental Table 3b. P values for Supplemental Table 2 (within group between NHANES time periods).

| NHANES                          | 1999-2004 vs 2005-2008 |        |          | 2005-2008 vs 2009-2012 |       |          | 1999-2004 vs 2009-2012 |        |          |
|---------------------------------|------------------------|--------|----------|------------------------|-------|----------|------------------------|--------|----------|
|                                 | White                  | Black  | Hispanic | White                  | Black | Hispanic | White                  | Black  | Hispanic |
| <b>Age, yr</b>                  | 0.87                   | 0.48   | 0.94     | 0.40                   | 0.48  | 0.09     | 0.36                   | 0.14   | 0.23     |
| <b>Sex, M:F</b>                 |                        |        |          |                        |       |          |                        |        |          |
| <b>Male, %</b>                  | 0.37                   | 0.78   | 0.19     | 0.97                   | 0.81  | 0.73     | 0.44                   | 0.94   | 0.25     |
| <b>Female, %</b>                | 0.37                   | 0.78   | 0.19     | 0.97                   | 0.81  | 0.73     | 0.44                   | 0.94   | 0.25     |
| <b>Healthcare visits/yr</b>     |                        |        |          |                        |       |          |                        |        |          |
| <b>0-1</b>                      | 0.28                   | 0.02   | 0.18     | 0.28                   | 0.43  | 0.07     | 0.02                   | <0.001 | 0.62     |
| <b>≥2</b>                       | 0.28                   | 0.02   | 0.18     | 0.28                   | 0.43  | 0.07     | 0.02                   | <0.001 | 0.62     |
| <b>Insured</b>                  | 0.23                   | 0.49   | 0.13     | 0.51                   | 0.75  | 0.52     | 0.56                   | 0.39   | 0.27     |
| <b>BMI, kg/m<sup>2</sup></b>    | 0.14                   | 0.002  | 0.73     | 0.39                   | 0.08  | <0.001   | 0.03                   | <0.001 | <0.001   |
| <b>BMI ≥30</b>                  | 0.29                   | 0.01   | 0.83     | 0.09                   | 0.27  | 0.005    | 0.009                  | <0.001 | 0.002    |
| <b>SBP, mmHg</b>                | <0.001                 | <0.001 | 0.02     | 0.01                   | 0.11  | 0.27     | <0.001                 | <0.001 | <0.001   |
| <b>DBP, mmHg</b>                | 0.004                  | 0.002  | 0.11     | 0.10                   | 0.35  | 0.36     | <0.001                 | <0.001 | 0.01     |
| <b>Non-HDL</b>                  | <0.001                 | <0.001 | 0.36     | 0.04                   | 0.46  | 0.02     | <0.001                 | <0.001 | 0.002    |
| <b>Hypercholesterolemia, %</b>  | 0.49                   | 0.97   | 0.50     | 0.96                   | 0.18  | 0.26     | 0.48                   | 0.23   | 0.09     |
| <b>Cholesterol treatment, %</b> | <0.001                 | <0.001 | <0.001   | 0.06                   | 0.03  | 0.003    | <0.001                 | <0.001 | <0.001   |
| <b>Diabetes, %</b>              | 0.001                  | 0.002  | 0.04     | 0.57                   | 0.87  | 0.12     | <0.001                 | <0.001 | <0.001   |
| <b>CVD, %</b>                   | 0.78                   | 0.06   | 0.04     | 0.46                   | 0.22  | 0.36     | 0.52                   | 0.40   | 0.004    |
| <b>CKD, %</b>                   | 0.30                   | 0.78   | 0.94     | 0.61                   | 0.96  | 0.39     | 0.66                   | 0.82   | 0.54     |
| <b>Smoking, %</b>               | 0.08                   | 0.79   | 0.95     | 0.005                  | 0.58  | 0.19     | 0.14                   | 0.70   | 0.19     |
| <b>10-yr CHD</b>                |                        |        |          |                        |       |          |                        |        |          |
| <b>&gt;20, %</b>                | 0.15                   | 0.01   | 0.01     | 0.72                   | 0.92  | 0.06     | 0.21                   | 0.01   | <0.001   |
| <b>&lt;10, %</b>                | 0.10                   | 0.93   | 0.89     | 0.50                   | 0.23  | 0.08     | 0.35                   | 0.13   | 0.08     |

NHANES=National Health and Nutrition Examination Survey; M=male; F=female; BMI=body mass index; S=systolic; D=diastolic; BP=blood pressure; non-HDL=non-high-density lipoprotein cholesterol; CVD=cardiovascular disease; CKD=chronic kidney disease; 10-yr CHD Risk=Framingham 10-yr coronary heart disease risk. P-values ≤0.01 are statistically significant. P-values in column 1 of NHANES 1999–2004 reflect comparisons with column 1 of NHANES 2005–2008, 2005–2008 with 2009–2012, and 2009–2012 with 1999–2004. Values in columns 2 and 3 reflect time period comparisons described for column 1.
